# Supplementary material
Source: publisher figshare collection journal article supplement (https://acs.figshare.com/ndownloader/files/4773823)

**The Synthesis, Molecular Structures and Supramolecular Architecture of Amine  
Adducts of Bis(pentafluorophenyl)zinc**

*Andrew J. Mountford, Simon J. Lancaster,\* Simon J. Coles, Peter N. Horton, David  
L. Hughes, Michael B. Hursthouse and Mark E. Light*

A series of eight adducts of the form  $(RR'R''N)_2\cdot Zn(C_6F_5)_2$  have been prepared and their solid state structures determined to investigate the role of intermolecular interactions involving pentafluorophenyl substituents in determining supramolecular architectures. A number of both intra- and inter-molecular non-covalent interactions are observed including phenyl-pentafluorophenyl stacking (**I**), X-H...F-C contacts (**II**) and offset face-to-face contacts between pentafluorophenyl rings (**III**), giving rise to one-, two- and three-dimensional supramolecular structures.

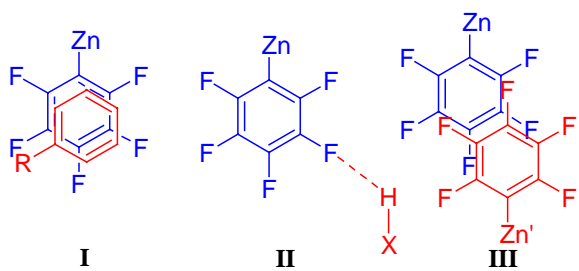

Supplement: Supplementary file 1 [file 4773823]
